# Supplementary material for: Identification of hepatocellular carcinoma related genes with k -th shortest paths in a protein–protein interaction network
Source: Royal Society of Chemistry journal article supplement (doi:10.1039/c3mb70089e), 2013-08-12
Supplement: c3mb70089e.fasta [file c3mb70089e.fasta]

>gi|387848859|emb|CCH57385.1|
MAARLYCQLDSSRDVLCLRPVGAESRGRPLARPLGAXSSPSPSAVPSDHGAHLSLRGLPVCAFSSXRSVC
TSLHLCTLHGNHRERPSGLAQGLIKEDSWTLSNVNDRPRGLLQRLCVKRLGGVWGGDKVNDLCIRRLKAK
IGLRTIIMQLFHFCL

>gi|283972007|gb|ADB55241.1|
MGGWSSLPDKAWGRIFLFPILWDSFPMPPSILSPEDTLILSIHL

>gi|283971963|gb|ADB55219.1|
MEIQEQLFPFPLLLLPQGLFLLRGGHNTKI

>gi|283971531|gb|ADB55003.1|
MTSWSSLGWQGMGTNLLVPIPLGFLPDHPLDPAFGALLPSLLGTSHPSSITGLKQIKFQRDSSGSGTAGP
IFFCWGVPFRNRKPCSDYCLTLLLPLL

>gi|283971565|gb|ADB55020.1|
MGGWSSKPRQGMRTNLSVPNPLGFFFLFPLWKAGILIREKLHAAPHFEGHPDVGNKRYSMGGRSSKPRQG
RGTSLCVHNHGGLFTDPQAHPPF

>gi|283971497|gb|ADB54986.1|
MEVGLPNLEKAWGQIFLYPIPWDSSPIISWILHSKPTQKIQIGTSTRTRTTGRTPTRWEWEHSGQGSPLP
TGDCWGGALKLRAYSQLCQQLLLLPPPIGSQEGSLLPYLHL

>gi|372978626|gb|AEY03012.1|
MQLFHLCLIQLLFMSHCSSLQAVPWVALGHGHRPV

>gi|168495224|gb|ACA25446.1|
MQLFHLCLIISCPCPTVQASKLCLGWLWGMDIDPYKEFGASVELLSFLPSDFFPSIRDLLDTASALYREA
LESPEHCSPHHTALRQAILCWGELMNLATWVGSNLEDPASRELVVSYVNVNMGLKIRQLLWFHIPCLTFG
RETVLEYLVSFGVWIRTPPAYRPPNAPILSTLPETTVVRRRGRSPRRRTPSPRRRRSNRRVAEDLNLGNL
NVSIPWTHKVGNFTGLYSSTVPVFNPDWQTPSFPHIHLQEGIINRCQQYVGPLTVNEKRRLKLIMPARFY
PNLTKYLPLDKGIKPYYPEHAVNHYFKTRHYLHTLWKAGILYKRETTRSASFCGSPYSWEQELQHGRLVF
QTSTRHGDESFCSQSSGILSRSPVGPCVRSQLKQSRLGLQPQQGSLARGKSGRSGSIRARVHPTTRRSFG
VEPSGSGHINNSASSTSSCLHQSAVRKTAYSHLSTSKRQSSSGHAVELHNIPPSSARSQSEGPIFSCWWL
QFRNSKPCSDYCLTHIVNLLEDWGPCTEHGEHNIRIPRTPARVTGGVFLVDKNPHNTTESRLVVDFSQFS
RGSTHVSWPKFAVPNLQSLTNLLSSNLSWLSLDVSAAFYHIPLHPAAMPHLLVGSSGLPRYVARLSSTSR
NINYQHGTMQDLHDSCSRDLYVSLLLLYKTFGRKLHLYSHPITLGFRKIPMGVGLSPFLLAQFTSAICSV
VRRAFPHCLAFSYMDDVVLGAESVQHLESLFTSITNFLLSLGIHLNPNKTKRWGYSLNFMGYVIGSWGTL
PQEHIVLKLKQCFRKLPVNRPIDWKVCQRIVGLLGFAAPFTQCGYPALMPLYACIQSKQAFTFSPTYKAF
LCKQYLNLYPVARQRSGLCQVFADATPTGWGLAIGHRRMRGTFVAPLPIHTAELLVACFARSRSGAKLIG
TDNSVVLSRKYTSFPWLLGCAANWILRGTSFVYVPSALNLADDPSRGRLGLYRPLLHLPFRPTTGRTSLY
AVSPSVPSHLPDRVHFASPLHVAWRPP

>gi|168495225|gb|ACA25447.1|
MPLSYQHFRKLLLLDDEAGPLEEELPRLADEGLIAASQKISISGISMLVSLGLIRWEILLGFILLLYLSL
ILTGKLPPFLTFIYRRALLIDVNNMWALLQLMKKGD

>gi|295367538|gb|ADG02681.1|
MQLFHLCLIISVHVLLFKPPSCALGGFGAWTLTRIKNLELLWSYSLFCLLTSFLLFEISSTPPPLCIGRP

>gi|198443755|gb|ACH88105.1|
MPLSYQHFPELLLLDDEAGPLEEELPRLADEGLNRRVAEDLNLGNLNLDPAFGANSNNPDWDFNPNKNHW
PEANQEHQLPARDHAKPARFLLKETLCFPLVAVQNLRTETALVFPSHHLGLSQDSYGSGPQSVSPGSVY

>gi|300078939|gb|ADJ67406.1|
SYIRGLLDSQQCQRPTLRHTSKTVYLKTGRSWGRRLGGCRHKLVCSPAPCNFFTSA

>gi|299801557|gb|ADJ51643.1|
MESTTSGFLGPLLVLXXXXXXXXXXXXXXXXXXXXXXXXXXXXXXXXXXXXXXXXXXXXXXXXXXXXXXX
XXXXXXXXXXXXXXXXXXXXXXXXXXXXXXXXXXXXXXXXXXXXXXXXXXXXXXTIPAQGTSMFPSCCCT
KPSDGNCTCIPIPSSWAFARFLWEWASVRFSWLSLLVPFVQWFVGLSPTVWLSVIWMMWYWGPSLYNILN
PFLPLLPIFFCLWVYI

>gi|38427383|gb|AAR20709.1|
MGLGHRPSAHAWNLCGSSADPYCGTPSSLFCSQPVWGKTYRHRQLSCPLSEIHLLS

>gi|38427143|gb|AAR20594.1|
MQLIITSKLGIIYILCGRLAFYIREKLHAAPHSVGHHILGNKSYS

>gi|194278117|gb|ACF39684.1|
MPLSYQHFRKLLLLDDEAGLLEDELPRLADEGLNRRVAEDLNLGNLNVSIPWTHKVGNFTGLYSSTVPVF
NPEWQTPSFPHIHLQEDIINRCQQYVGPLTINEKRRLKLIMPARFYPNLTKYLPLDKGIKPYYPEYAVNH
YFQTRHYLHTLWKAGILYKRETTRSASFCGSPILGNKIYSMGGWSSKPRQGMGTNLSVPNPLGFFPDHQL
DPAFGANSNNPDWDFNPNKDHWPEANQVGAGAFGPGFTPPHGGLLGWSPQAQGILTTVPAAHPPASTNRQ
SGRQPTPISPPLRDSHPQAMQWNSTTFHQTLQDPRVRGLYFPAGGSSSGTVNPVPTTASPISSIFSRIGD
PALNMENITSGFLGPLLVLQAGFFLLTRILTIPQSLDSWWTSLNFLGGTTVCLGQNSQSPISNHSPTSCP
PTCPGYRWMCLRRFIIFLFILLLCLIFLLVLLDYQGMLPVCPLIPGSSTTSTGPCRTCTTPAQGTSMYPS
CCCTKPSDGNCTCIPIPSSWAFGKFLWEWASARFSWLSLLVPFVQWFVGLSPTVWLSVIWMMWYWGPSLY
SILSPFLPLLPIFFVFGYTFEP

>gi|195957337|gb|ACG59471.1|
MQLFHLCLIISCSCPTVQASKLCLGWLWGMDIDPYKEFGASVELLSFLPSDFFPSIRDLLDTASALYREA
LESPEHCSPHHTALRQAILCWGEFISCLTFGRETVLEYLVSFGVWIRTPPAYRPPNAPILSTLPETTVVR
RRGRSPRRRTPSPRRRRSQSPRRRRSQSRESQC

>gi|21069870|gb|AAM34089.1|
GEEVRLSTRRL

>gi|223953229|gb|ACN29829.1|
MAARVCCQLDPARDVLCLRPVGAESRGRPVSGPFGALPSPSSSAVPADHGAHLSLRGLPVCAFSSAVPCA
LRFTSARRMETTVNAHQVLPKVLHKRTLGLPAMSTTDLEAYFKDCVFKDWEELGEEIRLKVFVLGGCRHK
LVCSPAPCNFFTTVNAHQVLPKVLHKRTLGLPAMSTTDLEAYFKDCVFKDWEELGEEIRLKVFVLGGCRH
KLVCSPAPCNFFTSA

>gi|139961|sp|P03164.1|Y15K_HBVD3
MDRQRSRKGSTHALMAHDQAPASGGCVSKHLAQTWPLPGNGVKVQVLFTQKGLVSWRESESLLRLNTCIQ
RHQRRITTLCKRGSKTQKTHNSLTYFPINRPVNRKFSKTFFDFLYDVFLWQGPITSNDITHKI

>gi|139908|sp|P03163.1|Y10K_HBVD3
MRRAEVKRSAHGPADEKAQTGSPRKERCAPWSVGTADGEGDERVPSDPEKGRPQDSAPTGRKQRTSRAGS
SWQHSLAAMETMYICGIGQQSYQSR

>gi|113374706|gb|ABI34726.1|
QSLDSVVDFSQFSRGNTRVSWPKFAVPQPPITYQPPVLQLVLAIAGCVCGVLSSSSSSCCYASSSCWFFW
TIKVCCPFVLYFQDPRPPARDHAKPAQLLLKEPLCFPLAAVQTLGRKLH

>gi|114053629|gb|ABI49592.1|
MDIDPYERIWSYCGVTLVFA

>gi|45723409|emb|CAG17770.1|
MDIDPYKEFGATVELLSFLPSDFFPSVRDLLDTASALYREALESPEHCSPHHTALRQAILCWGELMTLAT
WVGVNTANPDWDFNPNKDTWPDANKVGAGAFGSRDLVVSYVNTNMGLKFRQLLWFHISCLTFGRETVIEY
LVSFGVWIRTPPAYRPPNAPILSTLPETTVVRRRGRSPGGSSSGTVNPV

>gi|10190048|emb|CAC09282.1|
TLTKQKDGVIP
